# Supplementary material for: Profiling Immuno-Metabolic Mediators of Vitamin B12 Deficiency Among Metformin-Treated Type II Diabetes Patients in Ghana
Source: Research Square preprint supplement (doi:10.21203/rs.3.rs-117906/v1), 2020-12-02
Supplement: Supplementary file 1 [file 1921260caa466e9b88ee66da.docx]

**Table S1: Comparison of selected hematological parameters based on** **vitamin B12 status**

| **Hematological parameters** | **Non-deficient** | **Deficient** | **p-value** |
| --- | --- | --- | --- |
| TWBC (103/𝜇L) | 5.16±1.81 | 5.07±1.57 | 0.715 |
| RBC (106/𝜇L) | 4.01±0.61 | 4.03±0.58 | 0.830 |
| Hemoglobin (g/dL) | 12.11±1.55 | 11.98±1.52 | 0.574 |
| HCT (%) | 33.97±5.43 | 34.35±3.67 | 0.593 |
| MCV (fL) | 82.87±7.30 | 84.15±8.80 | 0.278 |
| MCH (pg) | 30.75±2.51 | 30.92±2.35 | 0.646 |
| MCHC (g/dL) | 36.49±1.86 | 36.49±1.90 | 0.654 |
| PLT (103/𝜇L) | 184.0 (150.0-210.0) | 192.0 (158.5-213.0) | 0.373 |
